22 **ABSTRACT**

23 Skeletal muscle repair is accomplished by satellite cells (MuSC) in cooperation with interstitial  
24 stromal cells (ISCs). So far, the relationship between the function of these cells and the metabolic state of  
25 myofibers remains unclear. The present study reports alterations in the proportion of both MuSCs and  
26 adipogenesis regulators (Aregs) induced by overexpression of peroxisome proliferator-activated receptor  
27 gamma coactivator 1-alpha (PGC-1 $\alpha$ ) in the myofibers (MCK-PGC-1 $\alpha$  mice). Although PGC-1 $\alpha$ -driven  
28 increase of MuSCs does not accelerate muscle regeneration, myogenic progenitors isolated from MCK-  
29 PGC-1 $\alpha$  mice and transplanted into intact and regenerating muscles are more prone to fuse with recipient  
30 myofibers than those derived from WT donors. Moreover, both young and aged MCK-PGC-1 $\alpha$  animals show  
31 reduced perilipin-positive areas when challenged with an adipogenic stimulus, demonstrating low propensity  
32 to accumulate adipocytes within the muscle. These results provide new insights on the role played by PGC-  
33 1 $\alpha$  in promoting myogenesis and hindering adipogenesis in the skeletal muscle.

34

35 **Keywords:** PGC-1 $\alpha$ , oxidative metabolism, muscle regeneration, satellite cells, adipogenesis, Aregs

36

37

## 38 INTRODUCTION

39 Muscle regeneration is a complex multi-step process that relies on the satellite cells (MuSCs)  
40 responsible for the postnatal myogenesis, as well as the maintenance of muscle integrity<sup>1</sup>. Under normal  
41 circumstances, MuSCs are quiescent and quickly activate upon injury, dividing and differentiating into  
42 myoblasts, that ultimately fuse to generate new myofibers. Although muscle regeneration is dependent upon  
43 MuSCs, it also requires the participation of other non-myogenic cells involved in orchestrating inflammation,  
44 debris clearance, extracellular matrix deposition and extrinsic regulation of MuSC activity<sup>2</sup>. In particular,  
45 interstitial stromal cells (ISCs) can participate to adult myogenesis and support MuSC function. The  
46 remarkable regenerative capacity of the skeletal muscle is compromised in aging due to decreased number  
47 and function of MuSCs, contributing to sarcopenia and frailty<sup>3-5</sup>. Aged-related faulty muscle regeneration is  
48 partially attributed to the reduced ability of ISCs, in particular of fibro-adipogenic progenitors (FAPs), to  
49 support MuSC activation and differentiation<sup>6</sup>. Moreover, functional decline of accessory cell is characteristic  
50 of myopathies such as Duchenne muscular dystrophy<sup>7</sup> and systemic conditions such as obesity, diabetes  
51 and cancer cachexia<sup>8-11</sup>.

52 Mitochondria are critical for preserving the metabolic fitness of the skeletal muscle. These organelles  
53 are deeply interconnected and form a network regulated by dynamic processes involving mitochondrial  
54 biogenesis, fission, fusion and mitophagy<sup>12</sup>. Upon activation and differentiation, MuSCs undergo a major  
55 genetic reprogramming to become metabolically active. Shortly after exiting quiescence, mitochondrial genes  
56 are robustly induced and MuSCs quickly accumulate mitochondrial mass in order to support the increasing  
57 energy demand needed for cell proliferation and myotube formation<sup>13,14</sup>. Mitochondrial dysfunction is a  
58 distinctive aspect of MuSC senescence in aging<sup>15</sup>. Consistently, preventing the decline of mitochondrial  
59 metabolism during aging rescues MuSC myogenic potential<sup>15,16</sup>, demonstrating that mitochondria are  
60 essential for the functional maintenance of MuSCs. Among the known players contributing to mitochondrial  
61 homeostasis, the peroxisome proliferator-activated receptor gamma coactivator 1 $\alpha$  (PGC-1 $\alpha$ ) stands out as  
62 powerful driver of mitochondrial biogenesis<sup>17</sup> and regulator of processes such as mitochondria fusion-fission  
63 events and mitophagy<sup>18-22</sup>. Aside from promoting muscle oxidative metabolism, PGC-1 $\alpha$  induces  
64 angiogenesis<sup>23</sup>, neuro-muscular junction remodeling<sup>24</sup> and increases the expression of structural proteins  
65 such as myosin heavy chain (MyHC) and utrophin<sup>25</sup>. Consistent with the broad effects on tissue plasticity,  
66 forced PGC-1 $\alpha$  overexpression in several experimental models of atrophy preserves skeletal muscle function  
67 and myofiber morphology<sup>26-32</sup>.

68 In addition to its beneficial effects in the skeletal muscle, PGC-1 $\alpha$  promotes the secretion of  
69 exercise-related myokines with both paracrine and endocrine functions, contributing to the crosstalk among  
70 muscle and fat, bone or brain<sup>33</sup>. Consistently, PGC-1 $\alpha$  overexpression in mature myofibers impacts on the  
71 MuSC niche<sup>34</sup>, modulating the local pro- and anti-inflammatory cytokine balance<sup>35,36</sup>. Nonetheless, to our  
72 knowledge, no clear association exists between the predominant oxidative environment, as dictated by  
73 myofiber PGC-1 $\alpha$  overexpression, and MuSC and ISC function. The present study provides new cues on the  
74 indirect impact of PGC-1 $\alpha$  in altering the balance and propensity to differentiate of myogenic and adipogenic  
75 populations that reside in the skeletal muscle.

76

## 77 RESULTS

### 78 PGC-1 $\alpha$ expression is transiently induced in early phases of muscle regeneration

79 Muscle regeneration is a highly energy-demanding process, and a progressive increase of  
80 mitochondrial function occurs in order to respond to the increased energetic needs<sup>37</sup>. Along this line, we  
81 characterized the reprogramming of oxidative metabolism in the *tibialis anterior* (TA) muscle of wild-type (WT)  
82 mice after BaCl<sub>2</sub>-induced injury. Muscle regeneration was assessed at 7, 10 and 13 days post-injury (dpi),  
83 when new myofiber formation and maturation occurs, and at 49 dpi (7 weeks post-injury) as a final-phase  
84 myofiber maturation timepoint. Myofiber cross-sectional morphology was evidently disrupted at 7, 10 and 13  
85 dpi, being associated with the presence of cell infiltrate, and was restored at 49 dpi, although central  
86 myonuclei still persisted (Figure 1A). Metabolic phenotype analysis, assessed by succinate dehydrogenase  
87 (SDH) staining, revealed a lack of definite phenotype at 7 and 10 dpi, with apparent improvement at 13 dpi  
88 and complete recovery at 49 dpi (Figure 1B). This trend was consistent with the initial loss and the  
89 subsequent progressive restoration of mitochondrial SDHA protein levels as muscle regeneration proceeds  
90 (Figure 1C, 1D). Interestingly, PGC-1 $\alpha$  protein content was strongly increased at the initial stages of muscle  
91 regeneration (7 and 10 dpi), returning to normal levels at 13 and 49 dpi (Figure 1C, 1E). Consistently,  
92 expression of the PGC-1 $\alpha$  downstream target gene *Cox4* was enhanced at 7 and 10 dpi (Figure 1F),  
93 although no changes in *Cycs* or *Sdha* expression was observed (Figure 1G, H). Notably, accumulation of  
94 PGC-1 $\alpha$  protein levels correlated with the induction of myogenic markers *Pax7*, *Myog* and *Myh3*, and M1  
95 macrophage marker *Cd68* at 7 and 10 dpi (Figure S1A-S1D). Regarding mitochondrial clearance, the  
96 mitophagy regulator gene *Prkn* was upregulated at 10 dpi (Figure 1I), whereas levels of *Fis1* and *Mfn2*,  
97 genes involved in mitochondrial fission and fusion respectively, remained unchanged (Figure 1J, 1K).  
98 Altogether, PGC-1 $\alpha$  expression is induced as a consequence of myofiber formation and presumably  
99 promotes the expression of genes related to mitochondrial homeostasis during muscle regeneration.

100

### 101 PGC-1 $\alpha$ -driven metabolic switch enhances myogenic potential of progenitor cell populations

102 The marked increase of PGC-1 $\alpha$  in regenerating muscles paved the way to investigate whether  
103 modulating this transcriptional cofactor could impinge on myogenesis. To this aim, MCK-PGC-1 $\alpha$  mice were  
104 used, which constitutively overexpress PGC-1 $\alpha$  in adult skeletal muscle (Figure S2A). Beyond the elevated  
105 mitochondrial content (Figure S2B, S2C), MCK-PGC-1 $\alpha$  animals show an increased number of central  
106 myonuclei compared to WT animals in the absence of injury (Figure 2A), suggesting a constitutive activation  
107 of MuSCs. Consistent with this observation, enzymatic digestion of hindlimb muscles revealed a number of  
108 mononucleated cells in MCK-PGC-1 $\alpha$  mice which was increased more than twice in comparison to WT  
109 animals (Figure 2B). In order to clarify if muscle-specific PGC-1 $\alpha$  overexpression affected MuSC myogenic  
110 potential, myoblasts were isolated from two muscles with different metabolic phenotypes (the mostly  
111 glycolytic *extensor digitorum longus* (EDL), and the predominantly oxidative *soleus*) and cultured in  
112 differentiation medium. Myotubes from WT-derived EDL explant accumulated lower levels of MyHC  
113 compared to those obtained from WT-*soleus* (Figure 2C), demonstrating that muscle metabolic background  
114 likely impacts on the myogenic potential of MuSCs. Following this line, myotubes differentiated from MuSC  
115 isolated from the EDL muscle of transgenic mice showed increased MyHC levels in comparison to those  
116 derived from WT-EDL. By contrast, myotubes obtained from *soleus*-derived MuSC accumulated similar  
117 levels of MyHC independently from mouse genotype (Figure 2C).

118 To better describe how PGC-1 $\alpha$  overexpression impacts on myogenic populations, muscle interstitial  
119 cells were isolated, stained for integrin- $\alpha$ 7 (a MuSC specific marker<sup>38</sup>) and characterized by flow cytometry.  
120 The analysis revealed that the skeletal muscle of MCK-PGC-1 $\alpha$  mice contains more integrin- $\alpha$ 7<sup>+</sup> cells in  
121 comparison to WT ones (Figure 2D). The possibility that an artefactual overexpression of PGC-1 $\alpha$  in MuSCs  
122 could occur was assessed. The results show that *Ppargc1a* expression was comparable in WT and MCK-  
123 PGC-1 $\alpha$ -derived MuSCs grown in proliferating conditions, while increased in transgenic cell-derived  
124 myotubes only, being consistent with the induction of *Mck* expression (Figure 2E).

125 Considering the accumulation of MuSCs in the skeletal muscle of transgenic animals, we tested if  
126 such abundance could result in improved muscle regeneration in middle-aged (12-months old) MCK-PGC-1 $\alpha$   
127 mice exposed to BaCl<sub>2</sub> injury. Basic histological analyses revealed neither macroscopic morphological  
128 changes nor improved myofiber cross-sectional area (CSA) in 3-months old (young adult) transgenic animals  
129 compared to WT mice at 14 dpi (Figure 2F, 2G). Similarly, PGC-1 $\alpha$  overexpression did not accelerate  
130 myofiber CSA recovery in middle-aged animals (Figure 2F, 2G). Overall, the metabolic switch imposed by  
131 PGC-1 $\alpha$  overexpression impacts on MuSC number and increases their myogenic potential *ex vivo* but is  
132 unable to force regeneration *in vivo*.

133

#### 134 **Transplantation of MCK-PGC-1 $\alpha$ -derived cells recapitulates the oxidative phenotype in the skeletal** 135 **muscle of WT mice**

136 Since constitutive PGC-1 $\alpha$  overexpression did not impinge on *in vivo* regeneration, whereas MuSCs  
137 from MCK-PGC-1 $\alpha$  mice displayed enhanced *ex vivo* myogenic capacity (Figure 2C), the possibility that  
138 transplantation of myogenic progenitors derived from transgenic animals could contribute to muscle  
139 regeneration *in vivo* was investigated. To this purpose, mononucleated cells were isolated from hindlimb  
140 muscles of WT and MCK-PGC-1 $\alpha$  donor animals and injected into the skeletal muscle (injured or intact) of  
141 WT recipients, according to the protocol described in Figure 3A. At 14 dpi, muscles transplanted with WT  
142 cells no longer showed morphological evidence of ongoing regeneration (Figure 3B) and presented with fully  
143 recovered CSA and a similar number of myofibers to non-injured muscles (Figure 3C, 3D). Consistently, no  
144 alterations on myogenin (MyoG) protein content (Figure 3E) or *Myh3* gene expression (Figure S3A) were  
145 observed. Nevertheless, Pax7 expression was increased in the injured group (Figure 3E), suggesting an  
146 increase in the MuSC pool. A completely different phenotype, with central myonuclei, cell infiltrate, reduced  
147 myofiber CSA and increased expression of Pax7 and MyoG was observed in both non-injured and injured  
148 muscles receiving MCK-PGC-1 $\alpha$  cells (Figure 3B-C, 3E). Moreover, an increased number of myofibers was  
149 reported in injured muscles upon MCK-PGC-1 $\alpha$ -derived cell injection (Figure 3D). This observation,  
150 associated with the parallel induction of *Myh3* expression (Figure S3A), was suggestive of new myofiber  
151 formation. Regarding the mitochondrial status, injured muscles transplanted with WT cells showed a  
152 complete recovery of oxidative/glycolytic myofiber distribution (Figure 3F) together with the persistent  
153 accumulation of PGC-1 $\alpha$  and COX-IV proteins (Figure 3G). Strikingly, intact muscles injected with MCK-  
154 PGC-1 $\alpha$  cells revealed a homogeneous SDH staining resembling the phenotype observed in transgenic  
155 animals (Figure 3F, S2B), suggesting that MCK-PGC-1 $\alpha$ -derived myogenic progenitors might have fused into  
156 non-regenerating host myofibers, recapitulating the metabolic phenotype of transgenic mice. Additionally, a  
157 similar metabolic conversion was observed in muscles injured previous to transplantation with transgenic

158 cells (Figure 3F). Consistent with these observations, PGC-1 $\alpha$  and COX-IV protein levels increased in both  
159 uninjured and injured recipient muscles (Figure 3G).

### 160 **Overexpression of PGC-1 $\alpha$ inhibits the adipogenic drift in the regenerating muscle**

161 Muscle regeneration is not only dependent on MuSCs but also on ISCs. Deficient FAP function  
162 compromises MuSC activation, contributing to fibrosis and adipocyte infiltration during faulty muscle  
163 regeneration<sup>6,39</sup>. Recently, new subpopulations of adipogenic regulators with the capacity of modulating  
164 adipogenesis have been identified in mammalian fat depots<sup>40,41</sup>. Moreover, cell populations with similar  
165 regulatory capabilities are found in the skeletal muscle as part of specific ISC subtypes<sup>42</sup>. To better  
166 investigate the effects of muscle-specific PGC-1 $\alpha$  overexpression on both myogenic and non-myogenic cells,  
167 we isolated mononucleated cells from WT and MCK-PGC-1 $\alpha$  muscles and analyzed the ISC distribution by  
168 flow cytometry. In comparison to WT mice, transgenic animals presented increased Sca1<sup>+</sup> cells associated  
169 with CD142 co-labeling, indicating an enrichment in adipogenesis regulators (Aregs; Figure 4A, B), a cell  
170 population described to exert anti-adipogenic functions<sup>40,42</sup>. On the contrary, the amounts of cells positive for  
171 CD55, a marker highly expressed in DPP4<sup>+</sup> pre-adipocytes<sup>41</sup>, was lower in MCK-PGC-1 $\alpha$  mice than in WT  
172 animals (Figure 4A, C).

173 The altered proportions of Aregs and CD55<sup>+</sup> cells suggested that the propensity to accumulate  
174 adipocytes after injury was altered in the skeletal muscle of PGC-1 $\alpha$  overexpressing animals. To this  
175 purpose, 50% glycerol (Gly) was injected in the TA muscle of young WT and MCK-PGC-1 $\alpha$  mice,  
176 reproducing a muscle injury model that promotes adipogenic infiltration<sup>43</sup>. As expected, a regenerative-like  
177 phenotype (Figure 5A) and the induction of *Myh3* expression was observed in Gly-injected TA muscles  
178 (Figure 5B). Injured muscle histology showed intramuscular white spots (Figure 5A), overlapping with Oil  
179 Red O (ORO) staining (Figure 5C). Additionally, RT-qPCR analysis revealed that adipocyte-related genes  
180 *Plin1*, *Adipoq* and *Fadq4* were induced in the muscle of both WT and MCK-PGC-1 $\alpha$  mice (Figure 5B), and  
181 perilipin immunofluorescence staining demonstrated the accumulation of intramyofibrillar adipocytes (Figure  
182 5D). Notably, expression of *Cd55* was significantly induced only in WT mice after Gly injury, whereas *Cd142*  
183 showed a strong tendency to increase in injured muscles of both WT and MCK-PGC-1 $\alpha$  mice (Figure 5B).  
184 Consistent with the reported reduction in pre-adipocytes and increase in Aregs, adipocyte infiltration was  
185 partially prevented in MCK-PGC-1 $\alpha$  animals as assessed by perilipin-immunofluorescence and densitometric  
186 analysis of the perilipin positive area (Figure 5D, E), demonstrating blunted adipogenic differentiation in the  
187 skeletal muscle of transgenic animals.

188 To further investigate if muscle PGC-1 $\alpha$  overexpression could reduce the adipogenic drift typically  
189 occurring during muscle regeneration in the elderly<sup>44,45</sup>, adipocyte infiltration in the skeletal muscle was also  
190 assessed in the above-mentioned 12-months old WT and MCK-PGC-1 $\alpha$  animals undergoing BaCl<sub>2</sub> injury  
191 (see data in Figures 2F, 2G). Perilipin-positive adipocytes were clearly detectable in injured muscles of  
192 middle-aged WT mice (Figure 5F). Consistent with the results obtained in young animals, older MCK-PGC-  
193 1 $\alpha$  animals presented with a reduced accumulation of intramyofibrillar adipocytes in comparison to WT ones  
194 (Figure 5J). The present results demonstrate that the predominant Areg subpopulation found in PGC-1 $\alpha$   
195 overexpressing muscles is associated with a decreased propensity to adipocyte differentiation during  
196 defective regeneration in aged animals.

197

## 198 DISCUSSION

199 Mounting evidence points to metabolism as a relevant factor in the regulation of stem cell  
200 quiescence, activation and differentiation in different tissues<sup>46</sup>. Specifically in the skeletal muscle, MuSC  
201 activation correlates with the induction of diverse metabolic pathways sustaining the high energy demand  
202 required for myoblast differentiation<sup>13</sup>, leading to an abrupt increase of mitochondrial activity and ATP  
203 availability<sup>14</sup>. In addition to supporting the increased energy demand, an increase in metabolic activity (both  
204 mitochondrial and non) generates metabolites that impinge on intracellular pathways that regulate stem cell  
205 function<sup>47,48</sup>. The current work provides evidence that an early, potentially PGC-1 $\alpha$ -driven, activation of  
206 mitochondrial biogenesis in regenerating myofibers contributes to restore the metabolic phenotype of a  
207 healthy muscle. The main novelty is the qualitative and quantitative impact exerted by PGC-1 $\alpha$  on the  
208 different muscle stem cell populations, including MuSCs and ISCs.

209 In the experimental conditions adopted in the current study, muscle regeneration in MCK-PGC-1 $\alpha$   
210 animals occurred with a similar kinetic in WT mice, despite the former show increased number of MuSCs  
211 which are endowed with enhanced *ex vivo* differentiation capacity. In this regard, PGC-1 $\alpha$  effects on  
212 myogenesis *in vivo* could be amplified in conditions characterized by disrupted muscle regeneration such as  
213 muscular dystrophies, whereas in healthy conditions the availability of more MuSCs might not impact on an  
214 already efficient regeneration process. The other way around, syngeneic allograft of transgenic muscle-  
215 derived cells recapitulated the oxidative phenotype in both injured and intact recipient muscles. Considering  
216 that exogenous cell engraftment is rarely observed in the absence of host muscle damage<sup>49</sup>, the oxidative  
217 conversion observed in uninjured muscles supports the possibility that transgenic cells do have increased  
218 fusion capability and myogenic potential. The high MyoG expression in muscles transplanted with MCK-  
219 PGC-1 $\alpha$ -derived cells could partially explain the increased fusion potential, consistently with recent evidence  
220 highlighting a central role played by MyoG in myoblast fusion<sup>50</sup>. However, the exact mechanism accounting  
221 for the improved ability of transgenic muscle progenitors to differentiate and fuse is far from being elucidated.

222 It is worth mentioning that the PGC-1 $\alpha$  transgenic construct used for this study is under the control of  
223 the MCK promoter<sup>51</sup>, implying that only mature myofibers overexpress PGC-1 $\alpha$  in intact skeletal muscle.  
224 However, MyoD was shown to be able to bind and activate the MCK promoter<sup>52</sup>. We have demonstrated that  
225 proliferating MuSCs obtained from transgenic animals do not present with overexpression of PGC-1 $\alpha$ .  
226 However, we cannot rule out that the isolation procedure, involving MuSC removal from their niche and the  
227 consequent rapid induction of MyoD<sup>53</sup>, could result in a transient PGC-1 $\alpha$  transgene induction critical to  
228 enhance progenitor cell engraftment. The promotion of mitochondrial respiration in myogenic progenitors  
229 was proven sufficient to endorse their differentiation potential<sup>54</sup>. In this line, an hypothetical early  
230 overexpression of PGC-1 $\alpha$  in myogenic precursor cells could increase mitochondrial content in MuSCs, and  
231 would therefore partially recapitulate the increased differentiation capability observed by Haralampieva *et al.*,  
232 in human myoblasts<sup>55</sup>. Nevertheless, our data support the idea that oxidative metabolism can be a potential  
233 tool to promote muscle repair when the regenerative capacity is impaired.

234 The present study also shows for the first time that myofiber PGC-1 $\alpha$  overexpression prevents  
235 intramuscular fat accumulation. Intramuscular adipogenesis consequent to glycerol exposure is associated  
236 with an exacerbated inflammatory response as compared to the cardiotoxin-induced injury, with the  
237 activation of adipogenic regulatory networks and with reduction of fatty acid  $\beta$ -oxidation<sup>56</sup>. Data obtained in  
238 mice carrying a PDGFR $\alpha$ -reporter transgene indicate that most of the adipocytes that accumulate after

239 glycerol injury arise from mesenchymal progenitors called FAPs<sup>39</sup>. However, whether FAPs can  
240 independently differentiate to adipocytes or require the interaction with other interstitial cells is still debated.  
241 The implementation of single cell transcriptomics to muscle regeneration has revealed that the  
242 Sca1<sup>+</sup>/PDGFR $\alpha$ <sup>+</sup> cell pool includes a peculiar CD142<sup>+</sup> population (Aregs) able to interfere with the propensity  
243 of CD142<sup>-</sup> ISCs to undergo adipogenic differentiation<sup>42</sup>. The present study shows that the decreased  
244 accumulation of mature adipocytes occurring in the muscle of MCK-PGC-1 $\alpha$  animals correlates with an  
245 unbalance between Aregs and CD55<sup>+</sup> cells, the former being more abundant than the latter. These results  
246 are in line with previous observations demonstrating a regulatory role of Aregs on adipocyte differentiation  
247 and support the idea that the adipogenic fate of mesenchymal progenitors is modulated by the balance of  
248 specific ISCs populations that reside in the extracellular matrix<sup>40,42</sup>.

249 From a mechanistic point of view, it is conceivable that PGC-1 $\alpha$  action on MuSCs and ISCs is driven  
250 by paracrine factors secreted by PGC-1 $\alpha$ -overexpressing myofibers<sup>33</sup>. As an example, MCK-PGC-1 $\alpha$  mice  
251 display high irisin levels. This latter is a polypeptide able to promote browning of the white adipose tissue<sup>57</sup>,  
252 thus being a factor potentially affecting adipocyte differentiation. Other hormonal mediators involved in  
253 modulating ISCs mitochondrial bioenergetics could also contribute to the anti-adipogenic drive reported in  
254 Gly-injured muscle of MCK-PGC-1 $\alpha$  animals. For instance, impaired muscle regeneration and increased  
255 muscle adiposity induced by the genetic inhibition of  $\alpha$ -Klotho mainly results from mitochondrial dysfunction  
256 in activated MuSCs<sup>58</sup>. This report could be consistent with the observation that in MCK-PGC-1 $\alpha$  animals,  
257 characterized by a pro-oxidative muscle metabolic phenotype, adipogenic differentiation after glycerol injury  
258 or in BaCl<sub>2</sub>-treated middle-aged mice is inhibited.

259 The inhibition of adipogenesis in MCK-PGC-1 $\alpha$  animals is particularly relevant to the study of  
260 diseases characterized by the progressive substitution of muscle mass with ectopic fat. Consistently, the  
261 results here reported reveal that adipocyte accumulation occurs in the injured muscle of middle-aged  
262 animals, and that such adipogenic drift is partially hindered in age-matched PGC-1 $\alpha$ -overexpressing mice,  
263 entailing a promising connection between ISC dysfunction in aging and muscle oxidative metabolism. To  
264 fully validate these observations, further research should be performed on old and geriatric animals, as  
265 lipodystrophy occurring after regeneration increases with age and negatively affects muscle function<sup>44,45</sup>.  
266 Additionally, clarifying the mechanisms underlying the regulatory function exerted by PGC-1 $\alpha$  on adipogenic  
267 populations is highly relevant to chronic muscle pathologies such as Duchenne muscular dystrophy or limb  
268 girdle muscular dystrophy 2B. Such diseases, indeed, are characterized by poor muscle morphology and  
269 increased disease severity that are associated with progressive replacement of muscle tissue with fat<sup>59,60</sup>.

270 In conclusion, the current results propose PGC-1 $\alpha$  as a driver of muscle regeneration, achieved  
271 through the modulation of MuSCs and ISCs, favoring the myogenic lineage over the adipogenic one. Overall,  
272 the data here reported support the idea that harnessing muscle metabolism could become a therapeutic tool  
273 to treat muscle conditions characterized by impaired muscle regeneration.

274

275

276

277

278



## 279 **MATERIALS AND METHODS**

280 All the reagents used in this study were obtained from Merck-MilliporeSigma (St. Louis, MO, USA)  
281 unless differently specified.

### 282 **Animals and experimental design**

283 Experimental animals were cared for in compliance with the Italian Ministry of Health Guidelines and  
284 the Policy on Humane Care and Use of Laboratory Animals (NRC, 2011). The experimental protocols were  
285 approved by the Bioethical Committee of the University of Torino (Torino, Italy) and the Animal Welfare  
286 Committee of KU Leuven (Leuven, Belgium). Animals were maintained on a regular dark-light cycle of 12:12  
287 hours with controlled temperature (18-23°C) and free access to food and water during the whole  
288 experimental period. Balb/c mice overexpressing PGC-1 $\alpha$  in the skeletal muscle (MCK-PGC-1 $\alpha$ ) were  
289 generated by backcrossing C57BL/6-Tg(Ckm-Ppargc1a)31Brspl<sup>j51</sup> (The Jackson Laboratory, Bar Harbor,  
290 CA, USA) with WT Balb/c mice (Charles River, Wilmington, MA, USA). The resulting offspring was analyzed  
291 for the presence of the transgenic construct (forward: 5'-GCCGTGACCACTGCAACGA-3' and reverse: 5'-  
292 CTGCATGGTTCTGAGTGCTAAG-3') through Melt Curve Analysis (RT-qPCR) and selected for further  
293 crosses with WT Balb/c mice. The colony was maintained breeding mice as hemizygotes for 8 generations.  
294 During all intramuscular (i.m.) injections, the animals were anesthetized with 2% isoflurane in O<sub>2</sub>. The  
295 animals were sacrificed under anesthesia at specific time points. After intracardiac blood collection,  
296 euthanasia was applied by means of cervical dislocation. Skeletal muscles were excised, weighted, frozen in  
297 liquid nitrogen and stored at -80°C for further analyses.

298 The time course of muscle regeneration (animal experiment 1) was performed in WT 6-weeks old  
299 female mice receiving a local muscle injury (i.m. injection of 30  $\mu$ l 1.2% BaCl<sub>2</sub>) in the TA muscle.  
300 Contralateral TA muscles were injected with filtered 0.9% NaCl solution and used as controls (Saline).  
301 Animals were euthanized at 7, 10, 13 and 49 dpi. Similarly, TA muscle injury of both WT and MCK-PGC-1 $\alpha$   
302 mice (animal experiment 2) was performed in 3-months and 12-months old female animals that were  
303 sacrificed at 14 dpi. Transplantation of isolated muscle-derived cells (animal experiment 3) was performed in  
304 WT 6-weeks old female mice previously injured in one of the TA muscles (approximately 8 hours before cell  
305 injection, see Figure 3A). Injected cells were isolated from the hindlimb muscles of either WT or MCK-PGC-  
306 1 $\alpha$  male mice according to an adaptation of the protocol described by Costamagna et al.<sup>11</sup>(see below: *Whole*  
307 *muscle isolation, transplantation and flow cytometry analysis* section). Mice were euthanized at 14 dpi. As for  
308 adipogenesis study, glycerol injury (animal experiment 4) was performed by i.m. injection of 30  $\mu$ l 50%  
309 glycerol sterile solution in the TA muscles of WT and MCK-PGC-1 $\alpha$  3-months old female mice. Animals were  
310 euthanized 21 dpi.

### 311 **Organ culture and myosin quantification**

312 EDL and *Soleus* muscles from 6-weeks old male mice (WT and MCK-PGC-1 $\alpha$ ) were rapidly excised,  
313 rinsed in sterile PBS containing 5% antibiotics (9:1 penicillin/streptomycin:gentamicin) and digested in PBS  
314 containing 0.02% type I collagenase (C0130) for 1h at 37°C. Digested muscles were plated on matrigel-  
315 coated dishes in DMEM supplemented with 20% FBS, 10% horse serum, 0.5% chick embryo extract and 1%  
316 penicillin-streptomycin. Three days later, muscle remnant was removed and medium was replaced with  
317 proliferation medium (DMEM 4.5 g/l, 20% FBS, 10% horse serum, 1% chick embryo extract). After 5 days,  
318 the medium was replaced with differentiation medium (DMEM 4.5 g/l, 2% horse serum and 0.5% chick

319 embryo extract). Primary myotube cultures were washed with PBS and fixed in acetone-methanol solution  
320 (1:1). Samples were then probed with anti-MyHC antibody (M4276) followed by labeling with secondary anti-  
321 mouse antibody Alexa Fluor 488 (A31627, Invitrogen, Carlsbad, CA, USA). Subsequently, myotubes were  
322 lysed with RIPA buffer (50 mmol/l Tris-HCl (pH 7.4), 150 mmol/l NaCl, 1% Nonidet P-40, 0.25% sodium  
323 deoxycholate, 1 mmol/l phenyl-methylsulfonyl fluoride), sonicated and centrifuged at 3000 rpm for 5 min. The  
324 pellet was discarded and fluorescence intensity of the supernatant was assessed (Alexa Fluor 488: ~495 nm  
325 excitation, ~519 nm emission; DAPI: ~358 nm excitation, ~461 nm emission).

## 326 **Whole muscle cell isolation, transplantation and flow cytometric analysis**

327 Hindlimb muscles from 6-weeks old male mice (WT and MCK-PGC-1 $\alpha$ ) were mechanically minced  
328 using a scalpel, washed with 5% antibiotics and enzymatically digested with 0.02% type I collagenase  
329 (C0130) and 0.06% pancreatine (P3292) upon shaking for 1 hour at 37°C. The suspension was then filtered  
330 using 70  $\mu$ m strainers (Falcon), the digestion was blocked with fetal bovine serum and cell suspension was  
331 kept at 37°C while the solid part was re-digested for additional 30 minutes repeating the steps above. For  
332 cell transplantation, the cell suspension was centrifuged for 5 minutes at 400 g at room temperature,  
333 resuspended in sterile saline solution and the equivalent amount of cells obtained from one TA donor muscle  
334 was injected in either injured or intact TA muscle of WT recipient mice. As for flow cytometric analysis,  
335 hindlimb muscles were enzymatically digested with 0.1% type II collagenase (C6885). Isolated cells were  
336 resuspended in growing medium (DMEM 4.5g/l glucose + 10% FBS) and kept at 37°C. After 4 hours,  
337 samples were probed with different combinations of conjugated primary antibodies (Table S1) and analyzed  
338 by flow cytometry (Canto II AIG, BD Biosciences, Franklin Lakes, NJ, USA). Finally, cultured MuSCs were  
339 isolated using two sequential enzymatic digestions while shaking at 37°C: a first incubation with 0.04%  
340 collagenase II (C6885) for 45 minutes, followed by 30 minutes digestion with 0.1% collagenase/dispase  
341 (11097113001, Roche Diagnostics, Mannheim, Germany). MuSCs were selected using the Satellite Cell  
342 Isolation Kit mouse (130-104-268, Miltenyi Biotec, Bergisch Gladbach, Germany), seeded at 2000 cells/cm<sup>2</sup>  
343 and grown for 3 days in growth medium (GM) containing 20% horse serum, 3% chick embryo extract, 1%  
344 HEPES, 1% glutamine and 1% penicillin-streptomycin. To induce myotube formation, GM was replaced with  
345 differentiating medium (DM) containing 2% horse serum and kept for 3 days.

## 346 **Muscle histology**

347 TA muscles were frozen in melting isopentane cooled in liquid nitrogen and stored at -80°C.  
348 Transverse sections of 10  $\mu$ m from the midbelly region were cut on a cryostat, left at room temperature for  
349 10 minutes and stored at -80°C for later staining. Hematoxylin/eosin staining (H&E) was performed following  
350 standard procedures. SDH staining was performed by incubating pre-warmed sections with SDH reagent (1  
351 mg/ml NTB, 27 mg/ml sodium succinate in PBS) at 37°C for 20 minutes. Slides were then rinsed twice with  
352 PBS, dehydrated using ethanol scale and xylene, mounted using Eukitt Quick-hardening mounting medium  
353 (03959). ORO staining was performed on sections fixed with 4% paraformaldehyde by incubating Oil Red O  
354 solution (0.5% in propylene glycol) at 60°C for 15 minutes. After washing with 85% propylene glycol for 5  
355 minutes, slides were counterstained with hematoxylin for 1 minute, air-dried and mounted with glycerol-PBS  
356 (3:1). Images were captured by a Leica DM750 optical microscope (Leica Camera AG, Wetzlar, Germany).

357 For immunofluorescence, the sections were fixed in 4% paraformaldehyde for 15 minutes, rinsed in  
358 PBS and probed with primary anti-laminin (1:100, L9393) or anti-perilipin A/B (1:200, P1873) antibodies.

359 Detection was performed using Alexa Fluor 488-conjugated secondary antibody (Invitrogen) and nuclei were  
360 counterstained with Hoechst 33342. Slides were mounted with glycerol-PBS (3:1) and fluorescence images  
361 were captured by an Axiovert 35 fluorescence microscope (Zeiss, Oberkochen, Germany) without altering  
362 light exposure parameters. Whole TA muscle sections were generated using GimpShop software. Perilipin  
363 densitometry on whole muscle sections was quantified using the ImageJ software.

#### 364 **Isolation, retro-transcription and RT-qPCR quantification of mRNA**

365 TA muscles were lysed in 1 ml of TRI Reagent and processed using the standard phenol-chloroform  
366 method. Briefly, 50  $\mu$ m thick muscle sections were shaken in 1 ml of TRI Reagent for 30 minutes at 4°C,  
367 added 200  $\mu$ l chloroform, mixed vigorously and centrifuged at 12000 *g* for 15 minutes. The RNA in the  
368 aqueous part was precipitated by 2-propanol and 70% ethanol, dried at room temperature and resuspended  
369 in sterile water. RNA concentration was quantified using Ribogreen reagent (Invitrogen). Total RNA was  
370 retro-transcribed using cDNA synthesis kit (Bio-Rad, Hercules, CA, USA) and transcript levels were  
371 determined by RT-qPCR using the SsoAdvanced SYBR Green Supermix and the CFX Connect Real-Time  
372 PCR Detection System (Bio-Rad). Every RT-qPCR was validated by analyzing the respective melting curve.  
373 Primer sequences are given in Table S2. Gene expression was normalized to *Actb* and results are  
374 expressed as relative expression ( $2^{-\Delta\Delta Ct}$ ).

#### 375 **Western blotting**

376 TA muscles were mechanically homogenized in RIPA buffer (PBS, 1% Igepal CA-630, 0.1% SDS)  
377 containing protease inhibitors (0.5 mM PMSF, 0.5 mM DTT, 2  $\mu$ g/ml leupeptin, 2  $\mu$ g/ml aprotinin), sonicated  
378 for 10 seconds at low intensity, centrifuged at 15000 *g* for 5 minutes at 4°C and the supernatant was  
379 collected. Total protein concentration was quantified with Bradford reagent (Bio-Rad), using BSA as protein  
380 concentration standard. Equal amounts of protein (15-30  $\mu$ g) were heat-denatured in sample-loading buffer  
381 (50 mM Tris-HCl, pH 6.8, 100 mM DTT, 2% SDS, 0.1% bromophenol blue, 10% glycerol), resolved by SDS-  
382 PAGE and transferred to nitrocellulose membranes (Bio-Rad). The filters were blocked with Tris-buffered  
383 saline (TBS) containing 0.05% Tween and 5% non-fat dry milk and then incubated overnight with antibodies  
384 directed against specific proteins (Table S2). Peroxidase conjugated IgGs (Bio-Rad) were used as  
385 secondary antibodies. Quantification of the bands was performed by densitometric analysis using a specific  
386 software (TotalLab, NonLinear Dynamics, Newcastle upon Tyne, UK).

#### 387 **Statistics**

388 Data are presented using bar and dot plots (mean) or box and whisker plots (line: median, whiskers:  
389 min to max), unless differently stated. Data representation and evaluation of statistical significance was  
390 performed with Prism (version 7, GraphPad) software. Normal distribution was evaluated by Shapiro-Wilk  
391 test. The significance of the differences was evaluated by appropriate two-sided statistical tests, being  
392 Student's "t"-test or analysis of variance (ANOVA) for normal distribution, and Mann-Whitney test or  
393 Kruskal-Wallis test for non-normal distribution. ANOVA and Kruskal-Wallis tests were followed by suitable  
394 post hoc analysis.

395

396 **REFERENCES**

- 397 1 Mauro A. Satellite cell of skeletal muscle fibers. *J Biophys Biochem Cytol* 1961; **9**: 493–5.
- 398 2 Wosczyzna MN, Rando TA. A Muscle Stem Cell Support Group: Coordinated Cellular Responses in  
399 Muscle Regeneration. *Dev Cell* 2018; **46**: 135–143.
- 400 3 Sousa-Victor P, Gutarra S, García-Prat L, Rodriguez-Ubveva J, Ortet L, Ruiz-Bonilla V *et al.* Geriatric  
401 muscle stem cells switch reversible quiescence into senescence. *Nature* 2014; **506**: 316–321.
- 402 4 Liu W, Klose A, Forman S, Paris ND, Wei-LaPierre L, Cortés-Lopéz M *et al.* Loss of adult skeletal  
403 muscle stem cells drives age-related neuromuscular junction degeneration. *Elife* 2017; **6**: 1–15.
- 404 5 Liu L, Charville GW, Cheung TH, Yoo B, Santos PJ, Schroeder M *et al.* Impaired Notch Signaling  
405 Leads to a Decrease in p53 Activity and Mitotic Catastrophe in Aged Muscle Stem Cells. *Cell Stem*  
406 *Cell* 2018; **23**: 544-556.e4.
- 407 6 Lukjanenko L, Karaz S, Stuelsatz P, Gurriaran-Rodriguez U, Michaud J, Dammone G *et al.* Aging  
408 Disrupts Muscle Stem Cell Function by Impairing Matricellular WISP1 Secretion from Fibro-  
409 Adipogenic Progenitors. *Cell Stem Cell* 2019; **24**: 433-446.e7.
- 410 7 Verhaart IEC, Aartsma-Rus A. Therapeutic developments for Duchenne muscular dystrophy. *Nat Rev*  
411 *Neurol* 2019; **15**: 373–386.
- 412 8 Penna F, Costamagna D, Fanzani A, Bonelli G, Baccino FM, Costelli P. Muscle Wasting and  
413 Impaired Myogenesis in Tumor Bearing Mice Are Prevented by ERK Inhibition. *PLoS One* 2010; **5**:  
414 e13604.
- 415 9 Fu X, Zhu M, Zhang S, Foretz M, Viollet B, Du M. Obesity impairs skeletal muscle regeneration via  
416 inhibition of AMP-activated protein kinase. *Diabetes* 2015; **65**: db150647.
- 417 10 Inaba S, Hinohara A, Tachibana M, Tsujikawa K, Fukada S. Muscle regeneration is disrupted by  
418 cancer cachexia without loss of muscle stem cell potential. *PLoS One* 2018; **13**: e0205467.
- 419 11 Costamagna D, Duellen R, Penna F, Neumann D, Costelli P, Sampaolesi M. Interleukin-4  
420 administration improves muscle function, adult myogenesis, and lifespan of colon carcinoma-bearing  
421 mice. *J Cachexia Sarcopenia Muscle* 2020; : jcsm.12539.
- 422 12 Hood DA, Memme JM, Oliveira AN, Triolo M. Maintenance of Skeletal Muscle Mitochondria in Health,  
423 Exercise, and Aging. *Annu Rev Physiol* 2019; **81**: 19–41.
- 424 13 Dell’Orso S, Juan AH, Ko K, Naz F, Gutierrez-Cruz G, Feng X *et al.* Single-cell analysis of adult  
425 skeletal muscle stem cells in homeostatic and regenerative conditions. *Development* 2019; **146**:  
426 dev181743.
- 427 14 Tang AH, Rando TA. Induction of autophagy supports the bioenergetic demands of quiescent muscle  
428 stem cell activation. *EMBO J* 2014; **33**: 2782–2797.
- 429 15 Zhang H, Ryu D, Wu Y, Gariani K, Wang X, Luan P *et al.* NAD<sup>+</sup> repletion improves mitochondrial and  
430 stem cell function and enhances life span in mice. *Science* 2016; **352**: 1436–43.
- 431 16 Brett JO, Arjona M, Ikeda M, Quarta M, de Morrée A, Egnér IM *et al.* Exercise rejuvenates quiescent  
432 skeletal muscle stem cells in old mice through restoration of Cyclin D1. *Nat Metab* 2020; **2**: 307–317.
- 433 17 Wu Z, Puigserver P, Andersson U, Zhang C, Adelmant G, Mootha V *et al.* Mechanisms Controlling  
434 Mitochondrial Biogenesis and Respiration through the Thermogenic Coactivator PGC-1. *Cell* 1999;  
435 **98**: 115–124.
- 436 18 Soriano FX, Liesa M, Bach D, Chan DC, Palacin M, Zorzano A. Evidence for a Mitochondrial

- 437 Regulatory Pathway Defined by Peroxisome Proliferator-Activated Receptor- Coactivator-1 ,  
438 Estrogen-Related Receptor- , and Mitofusin 2. *Diabetes* 2006; **55**: 1783–1791.
- 439 19 Vainshtein A, Desjardins EM, Armani A, Sandri M, Hood DA. PGC-1 $\alpha$  modulates denervation-induced  
440 mitophagy in skeletal muscle. *Skelet Muscle* 2015; **5**: 9.
- 441 20 Halling JF, Ringholm S, Olesen J, Prats C, Pilegaard H. Exercise training protects against aging-  
442 induced mitochondrial fragmentation in mouse skeletal muscle in a PGC-1 $\alpha$  dependent manner. *Exp*  
443 *Gerontol* 2017; **96**: 1–6.
- 444 21 Yeo D, Kang C, Gomez-Cabrera MC, Vina J, Ji LL. Intensified mitophagy in skeletal muscle with  
445 aging is downregulated by PGC-1 $\alpha$  overexpression in vivo. *Free Radic Biol Med* 2019; **130**: 361–  
446 368.
- 447 22 Filadi R, Pendin Di, Pizzo P. Mitofusin 2: from functions to disease. *Cell Death Dis* 2018; **9**: 330.
- 448 23 Arany Z, Foo S-Y, Ma Y, Ruas JL, Bommi-Reddy A, Girnun G *et al.* HIF-independent regulation of  
449 VEGF and angiogenesis by the transcriptional coactivator PGC-1 $\alpha$ . *Nature* 2008; **451**: 1008–1012.
- 450 24 Arnold A-S, Gill J, Christe M, Ruiz R, McGuirk S, St-Pierre J *et al.* Morphological and functional  
451 remodelling of the neuromuscular junction by skeletal muscle PGC-1 $\alpha$ . *Nat Commun* 2014; **5**: 3569.
- 452 25 Selsby JT, Morine KJ, Pendrak K, Barton ER, Sweeney HL. Rescue of Dystrophic Skeletal Muscle by  
453 PGC-1 $\alpha$  Involves a Fast to Slow Fiber Type Shift in the mdx Mouse. *PLoS One* 2012; **7**: e30063.
- 454 26 Sandri M, Lin J, Handschin C, Yang W, Arany ZP, Lecker SH *et al.* PGC-1 protects skeletal muscle  
455 from atrophy by suppressing FoxO3 action and atrophy-specific gene transcription. *Proc Natl Acad*  
456 *Sci* 2006; **103**: 16260–16265.
- 457 27 Handschin C, Kobayashi YM, Chin S, Seale P, Campbell KP, Spiegelman BM. PGC-1 regulates the  
458 neuromuscular junction program and ameliorates Duchenne muscular dystrophy. *Genes Dev* 2007;  
459 **21**: 770–783.
- 460 28 Da Cruz S, Parone PA, Lopes VS, Lillo C, McAlonis-Downes M, Lee SK *et al.* Elevated PGC-1 $\alpha$   
461 Activity Sustains Mitochondrial Biogenesis and Muscle Function without Extending Survival in a  
462 Mouse Model of Inherited ALS. *Cell Metab* 2012; **15**: 778–786.
- 463 29 Cannavino J, Brocca L, Sandri M, Bottinelli R, Pellegrino MA. PGC1- $\alpha$  over-expression prevents  
464 metabolic alterations and soleus muscle atrophy in hindlimb unloaded mice. *J Physiol* 2014; **592**:  
465 4575–4589.
- 466 30 Cannavino J, Brocca L, Sandri M, Grassi B, Bottinelli R, Pellegrino MA. The role of alterations in  
467 mitochondrial dynamics and PGC-1 $\alpha$  over-expression in fast muscle atrophy following hindlimb  
468 unloading. *J Physiol* 2015; **593**: 1981–1995.
- 469 31 Pin F, Busquets S, Toledo M, Camperi A, Lopez-Soriano FJ, Costelli P *et al.* Combination of exercise  
470 training and erythropoietin prevents cancer-induced muscle alterations. *Oncotarget* 2015; **6**: 43202–  
471 15.
- 472 32 Gill JF, Delezie J, Santos G, McGuirk S, Schnyder S, Frank S *et al.* Peroxisome proliferator-activated  
473 receptor  $\gamma$  coactivator 1 $\alpha$  regulates mitochondrial calcium homeostasis, sarcoplasmic reticulum  
474 stress, and cell death to mitigate skeletal muscle aging. *Aging Cell* 2019; : 1–13.
- 475 33 Schnyder S, Handschin C. Skeletal muscle as an endocrine organ: PGC-1 $\alpha$ , myokines and exercise.  
476 *Bone* 2015; **80**: 115–125.
- 477 34 Dinulovic I, Furrer R, Beer M, Ferry A, Cardel B, Handschin C. Muscle PGC-1 $\alpha$  modulates satellite

- 478 cell number and proliferation by remodeling the stem cell niche. *Skelet Muscle* 2016; **6**: 39.
- 479 35 Furrer R, Eisele PS, Schmidt A, Beer M, Handschin C. Paracrine cross-talk between skeletal muscle  
480 and macrophages in exercise by PGC-1 $\alpha$ -controlled BNP. *Sci Rep* 2017; **7**: 40789.
- 481 36 Dinulovic I, Furrer R, Di Fulvio S, Ferry A, Beer M, Handschin C. PGC-1 $\alpha$  modulates necrosis,  
482 inflammatory response, and fibrotic tissue formation in injured skeletal muscle. *Skelet Muscle* 2016;  
483 **6**: 38.
- 484 37 Duguez S, Féasson L, Denis C, Freyssenet D. Mitochondrial biogenesis during skeletal muscle  
485 regeneration. *Am J Physiol Metab* 2002; **282**: E802–E809.
- 486 38 Sacco A, Doyonnas R, Kraft P, Vitorovic S, Blau HM. Self-renewal and expansion of single  
487 transplanted muscle stem cells. *Nature* 2008; **456**: 502–506.
- 488 39 Kopinke D, Roberson EC, Reiter JF. Ciliary Hedgehog Signaling Restricts Injury-Induced  
489 Adipogenesis. *Cell* 2017; **170**: 340-351.e12.
- 490 40 Schwalie PC, Dong H, Zachara M, Russeil J, Alpern D, Akchiche N *et al.* A stromal cell population  
491 that inhibits adipogenesis in mammalian fat depots. *Nature* 2018; **559**: 103–108.
- 492 41 Merrick D, Sakers A, Irgebay Z, Okada C, Calvert C, Morley MP *et al.* Identification of a mesenchymal  
493 progenitor cell hierarchy in adipose tissue. *Science (80- )* 2019; **364**: eaav2501.
- 494 42 Camps J, Breuls N, Sifrim A, Giarratana N, Corvelyn M, Danti L *et al.* Interstitial Cell Remodeling  
495 Promotes Aberrant Adipogenesis in Dystrophic Muscles. *Cell Rep* 2020; **31**: 107597.
- 496 43 Pisani DF, Bottema CDK, Butori C, Dani C, Dechesne CA. Mouse model of skeletal muscle adiposity:  
497 A glycerol treatment approach. *Biochem Biophys Res Commun* 2010; **396**: 767–773.
- 498 44 Addison O, Drummond MJ, Lastayo PC, Dibble LE, Wende AR, McClain DA *et al.* Intramuscular fat  
499 and inflammation differ in older adults: The impact of frailty and inactivity. *J Nutr Health Aging* 2014;  
500 **18**: 532–538.
- 501 45 Sciorati C, Clementi E, Manfredi AA, Rovere-Querini P. Fat deposition and accumulation in the  
502 damaged and inflamed skeletal muscle: cellular and molecular players. *Cell Mol Life Sci* 2015; **72**:  
503 2135–2156.
- 504 46 Shapira SN, Christofk HR. Metabolic Regulation of Tissue Stem Cells. *Trends Cell Biol* 2020; **30**:  
505 566–576.
- 506 47 Burgess RJ, Agathocleous M, Morrison SJ. Metabolic regulation of stem cell function. *J Intern Med*  
507 2014; **276**: 12–24.
- 508 48 Li X, Egervari G, Wang Y, Berger SL, Lu Z. Regulation of chromatin and gene expression by  
509 metabolic enzymes and metabolites. *Nat Rev Mol Cell Biol* 2018; **19**: 563–578.
- 510 49 Briggs D, Morgan JE. Recent progress in satellite cell/myoblast engraftment - relevance for therapy.  
511 *FEBS J* 2013; **280**: 4281–4293.
- 512 50 Ganassi M, Badodi S, Wanders K, Zammit PS, Hughes SM. Myogenin is an essential regulator of  
513 adult myofibre growth and muscle stem cell homeostasis. *Elife* 2020; **9**: 1–23.
- 514 51 Lin J, Wu H, Tarr PT, Zhang C-Y, Wu Z, Boss O *et al.* Transcriptional co-activator PGC-1 $\alpha$  drives the  
515 formation of slow-twitch muscle fibres. *Nature* 2002; **418**: 797–801.
- 516 52 Bergstrom DA, Penn BH, Strand A, Perry RLS, Rudnicki MA, Tapscott SJ. Promoter-Specific  
517 Regulation of MyoD Binding and Signal Transduction Cooperate to Pattern Gene Expression. *Mol*  
518 *Cell* 2002; **9**: 587–600.

- 519 53 Machado L, Esteves de Lima J, Fabre O, Proux C, Legendre R, Szegedi A *et al.* In Situ Fixation  
520 Redefines Quiescence and Early Activation of Skeletal Muscle Stem Cells. *Cell Rep* 2017; **21**: 1982–  
521 1993.
- 522 54 Sala D, Cunningham TJ, Stec MJ, Etzaniz U, Nicoletti C, Dall’Agnese A *et al.* The Stat3-Fam3a axis  
523 promotes muscle stem cell myogenic lineage progression by inducing mitochondrial respiration. *Nat*  
524 *Commun* 2019; **10**: 1796.
- 525 55 Haralampieva D, Salemi S, Dinulovic I, Sulser T, Ametamey SM, Handschin C *et al.* Human Muscle  
526 Precursor Cells Overexpressing PGC-1 $\alpha$  Enhance Early Skeletal Muscle Tissue Formation. *Cell*  
527 *Transplant* 2017; **26**: 1103–1114.
- 528 56 Lukjanenko L, Brachat S, Pierrel E, Lach-Trifilieff E, Feige JN. Genomic Profiling Reveals That  
529 Transient Adipogenic Activation Is a Hallmark of Mouse Models of Skeletal Muscle Regeneration.  
530 *PLoS One* 2013; **8**: e71084.
- 531 57 Boström P, Wu J, Jedrychowski MP, Korde A, Ye L, Lo JC *et al.* A PGC1- $\alpha$ -dependent myokine that  
532 drives brown-fat-like development of white fat and thermogenesis. *Nature* 2012; **481**: 463–468.
- 533 58 Sahu A, Mamiya H, Shinde SN, Cheikhi A, Winter LL, Vo N V. *et al.* Age-related declines in  $\alpha$ -Klotho  
534 drive progenitor cell mitochondrial dysfunction and impaired muscle regeneration. *Nat Commun* 2018;  
535 **9**: 4859.
- 536 59 Li W, Zheng Y, Zhang W, Wang Z, Xiao J, Yuan Y. Progression and variation of fatty infiltration of the  
537 thigh muscles in Duchenne muscular dystrophy, a muscle magnetic resonance imaging study.  
538 *Neuromuscul Disord* 2015; **25**: 375–380.
- 539 60 Hogarth MW, Defour A, Lazarski C, Gallardo E, Diaz Manera J, Partridge TA *et al.* Fibroadipogenic  
540 progenitors are responsible for muscle loss in limb girdle muscular dystrophy 2B. *Nat Commun* 2019;  
541 **10**: 2430.

542

#### 543 **ACKNOLOGEMENTS**

544 This work was supported by World Anti-doping Agency (WADA; Grant IOC15E01PC, P.I. P. Costelli),  
545 Fondazione CARIPO (Grant 2017-0604 to F. Penna), Fondazione AIRC (IG 2018—ID. 21963 project, P.I.  
546 F. Penna), University of Torino (ex-60% funds), Consorzio Interuniversitario di Biotecnologie (Contributi  
547 mobilità 2018 to M. Beltrà), Association française contre les myopathies (AFM)-Téléthon (European Post-  
548 doctoral fellowship n°20673; to D. Costamagna) and Fonds Wetenschappelijk Onderzoek (FWO; Grant  
549 G0D4517N to M. Sampaolesi).

550

#### 551 **AUTHOR CONTRIBUTIONS**

552 MB designed, performed and analyzed the data of the majority of the experiments under the guidance of MS,  
553 F Penna and PC; MB, F Penna and PC wrote and edited the manuscript, whereas D Costamagna, RD, VM,  
554 D Coletti and MS revised the manuscript; F Pin conducted the experiments regarding *ex vivo* tissue culture  
555 and BaCl<sub>2</sub> injection in young animals shown in Figure 2; D Costamagna and RD contributed to the isolation  
556 and flow cytometry analysis of cells isolated from hindlimb muscles shown in Figure 2D and Figure 4; AR  
557 contributed to the isolation, expansion and differentiation of MuSCs analyzed in Figure 2E; RB, LGC and AI  
558 contributed to cell isolation and transplantation, as well as conducted some of the downstream procedures  
559 related to Figure 3.

560 **FIGURE LEGENDS**

561 **Figure 1. Modulation of mitochondrial markers during muscle regeneration**

562 The TA muscle of WT mice was injured with 1.2% BaCl<sub>2</sub> and muscle regeneration was assessed at 7, 10, 13  
563 and 49 dpi. Every time point was assessed in n=5 mice except from 10 dpi with n=4 mice. Saline  
564 corresponds to the non-injured contralateral TA muscle of 49 dpi group (n=4); (A-B) Representative images  
565 of H&E and SDH staining of intact (saline) and BaCl<sub>2</sub>-injected TA muscles (scale bar: 100 μm); (C-E)  
566 Densitometry analysis of western blotting bands of PGC-1α and SDHA proteins. Total protein load was  
567 normalized by means of GAPDH protein expression; (F-K) RT-qPCR quantification of *Cycs*, *Cox4*, *Sdha*,  
568 *Prkn*, *Fis1* and *Mfn2* genes. Data are normalized by *Actb* expression and displayed as relative expression  
569 ( $2^{-\Delta\Delta Ct}$ ; mean ± SD) vs Saline group. Statistical analysis: \*p<0.05, \*\*p<0.01, \*\*\*p<0.001 vs Saline group  
570 (either One-way ANOVA + Dunnett's test or Kruskal–Wallis + Dunn's test).

571 **Figure 2. MCK-PGC-1α mice show increased myogenic precursors in the skeletal muscle, endowed**  
572 **with enhanced differentiation capacity *ex vivo* but not *in vivo*.**

573 (A) Representative images of Laminin/Hoechst immunostaining (scale bar: 25 μm) and quantification of  
574 central myonuclei of the TA muscle of WT (n=6) or MCK-PGC-1α (n=4) mice; (B) Total cell count after  
575 isolation of muscle interstitial cells from hindlimb muscles of WT (n=5) and MCK-PGC-1α (n=5) mice  
576 normalized per mg of tissue; (C) Quantification of AF488 fluorescent signal according to anti-MyHC antibody  
577 binding in the supernatant of lysates of *soleus* and EDL-derived primary myotube cultures of both WT (n=3)  
578 and MCK-PGC-1α mice (n=3); (D) Representative panels of gate distribution and relative quantification of  
579 positive events (cells) according to anti-integrin-α7 and anti-CD34 antibody binding in hindlimb muscles of  
580 WT (n=5) and MCK-PGC-1α (n=5) mice. Numbers in gates represent the mean percentage of cells by each  
581 specific labeling combination. Total number of MuSCs cells was obtained by normalizing integrin-α7 relative  
582 positivity with number of isolated cells/mg of tissue; (E) *Ppargc1a* and *Mck* gene expression in proliferating  
583 (GM) and differentiated (DM) MuSCs derived from WT (n=5) and MCK-PGC-1α (n=7) cultured *ex vivo*. Data  
584 are normalized by *H2bc4* expression and displayed as relative expression ( $2^{-\Delta\Delta Ct}$ ; mean) vs WT group; (F)  
585 Representative images of H&E staining (scale bar: 50 μm) of WT (n=6) and MCK-PGC-1α (n=6) animals  
586 injured using 1.2% BaCl<sub>2</sub>. Skeletal muscles were evaluated at 14 dpi; (G) CSA of TA muscles expressed as  
587 percentages of WT intact muscles. Significance of the differences: \*p<0.05, \*\*p<0.01 vs WT group (either  
588 Student's t-test or Mann–Whitney test); groups with distinct letters are statistically different (Two-way ANOVA  
589 + Tukey's test)

590 **Figure 3. MCK-PGC-1α cell transplantation recapitulates the transgenic phenotype even in a non-**  
591 **regenerative environment.**

592 (A) Schematic representation of the transplantation experiment. Mononucleated cells were enzymatically  
593 isolated from hindlimb muscles of donor mice WT and MCK-PGC-1α mice and were transplanted to intact or  
594 injured TA muscles of recipient WT animals. Injured TA muscles were injected with 1.2% BaCl<sub>2</sub>  
595 approximately 8 hours before cell transplantation. Groups of recipient mice consisted of n=5 animals, except  
596 for BaCl<sub>2</sub> group with n=4 mice, and were sacrificed 14 dpi; (B) Representative images of H&E staining (scale  
597 bar: 100 μm); (C, D) CSA and total number of myofibers in a single TA muscle; (E, G) Representative  
598 western blotting bands and densitometry analysis of Pax7, MyoG, PGC-1α and COX-IV proteins. Total



599 protein load was normalized by means of  $\alpha$ -tubulin protein expression. Pax7, MyoG and PGC-1 $\alpha$  share the  
600 same  $\alpha$ -tubulin normalization images since they were analyzed on the same gel. Groups with distinct letters  
601 are statistically different (One-way ANOVA + Tukey's test); (F) Representative images of SDH staining (scale  
602 bar: 100  $\mu$ m).

603 **Figure 4. PGC-1 $\alpha$  promotes the accumulation of Aregs against pre-adipocytes in the skeletal muscle.**  
604 (A) Representative panels of gate distribution and relative quantification of positive events (cells) according  
605 to anti-Sca1, anti-CD55 or anti-CD142 antibody binding. Numbers in gates represent the mean percentage  
606 of cells by each specific labeling combination; (B) Sca1+, CD142+ and Sca1+/CD142+ cells normalized by  
607 total number of isolated cells by mg of tissue; (C) Sca1+, CD55+ and Sca1+/CD55+ cells normalized by total  
608 number of isolated cells by mg of tissue; Significance of the differences: \* $p < 0.05$ , \*\* $p < 0.01$  vs WT group  
609 (Student's t-test).

610 **Figure 5. Muscle PGC-1 $\alpha$  overexpression prevents the accumulation of intramuscular adipocytes.**  
611 (A) Representative images of H&E staining (scale bar: 200  $\mu$ m); (B) Heatmap showing relative expression of  
612 *Myh3*, *Plin4*, *Adipoq*, *Fabp4*, *CD55* and *Cd142* genes by RT-qPCR quantification. Data are normalized by  
613 *Actb* expression and displayed as relative expression ( $2^{-\Delta\Delta Ct}$ ; mean) vs WT-Sham group. Significance of the  
614 differences: \* $p < 0.05$  vs WT-Sham or MCK-PGC-1 $\alpha$ -Sham group (Two-way ANOVA + Holm-Šídák test); (C)  
615 Representative images of ORO staining (scale bar: 200  $\mu$ m); (D) Representative images of perilipin/Hoechst  
616 immunostaining (scale bar: 500  $\mu$ m). Red-dotted rectangles highlight the same area shown in panels C and  
617 D; (E) Densitometric quantification of Alexa488 signal, proportional to anti-perilipin antibody labeling.  
618 Significance of the differences: \* $p < 0.05$  vs WT + Gly (Student's t-test); (F) Representative images of  
619 perilipin/Hoechst immunostaining of TA muscle of 12-months old WT (n=7) and MCK-PGC-1 $\alpha$  mice (n=7)  
620 injected with BaCl<sub>2</sub> at 14 dpi (scale bar: 500  $\mu$ m); (G) Densitometric quantification of Alexa488 signal,  
621 proportional to anti-perilipin antibody labeling. Significance of the differences: \* $p < 0.05$  vs WT + BaCl<sub>2</sub>  
622 (Student's t-test).

**Figure 1**

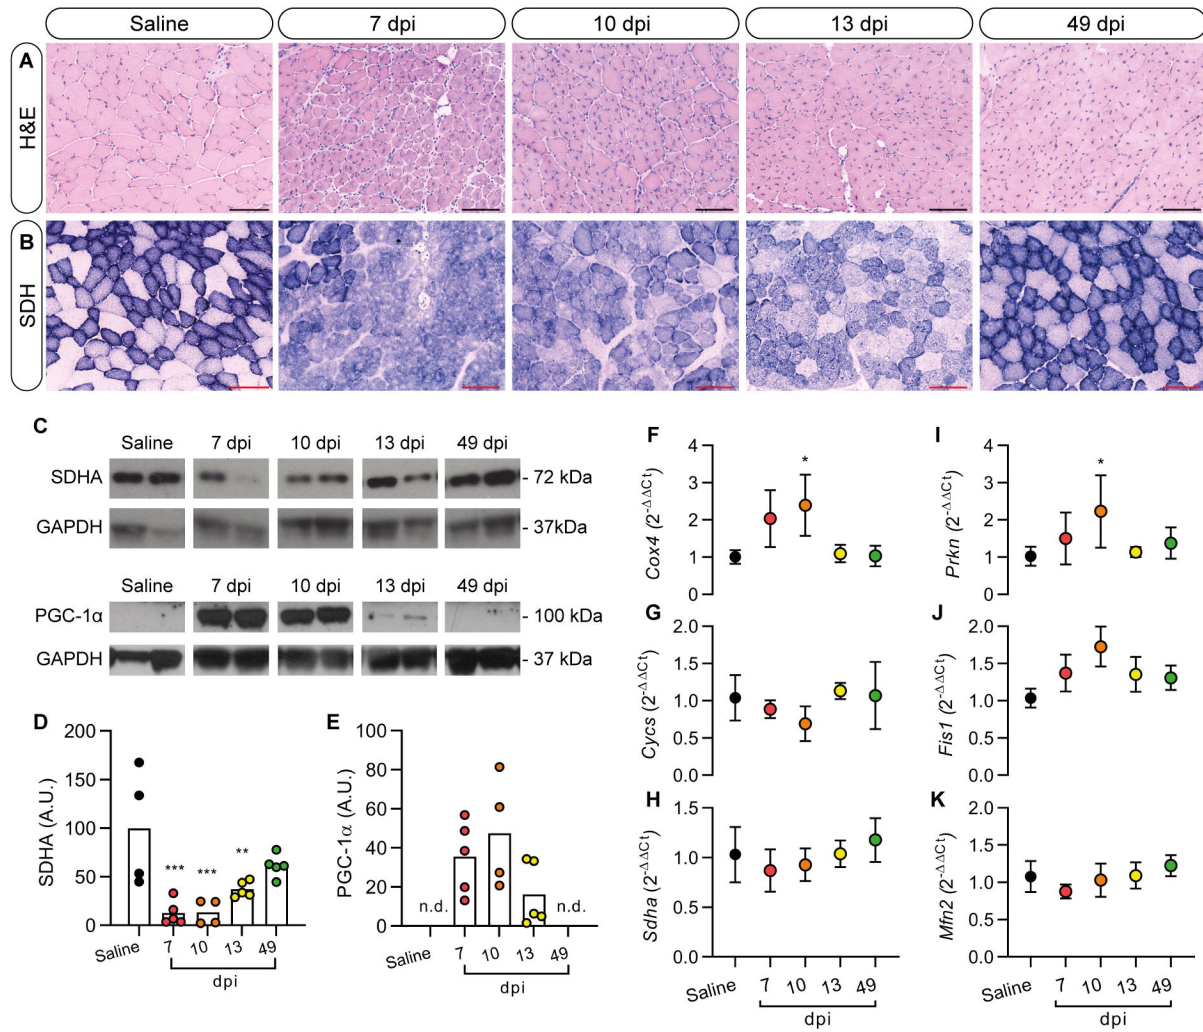

Figure 2

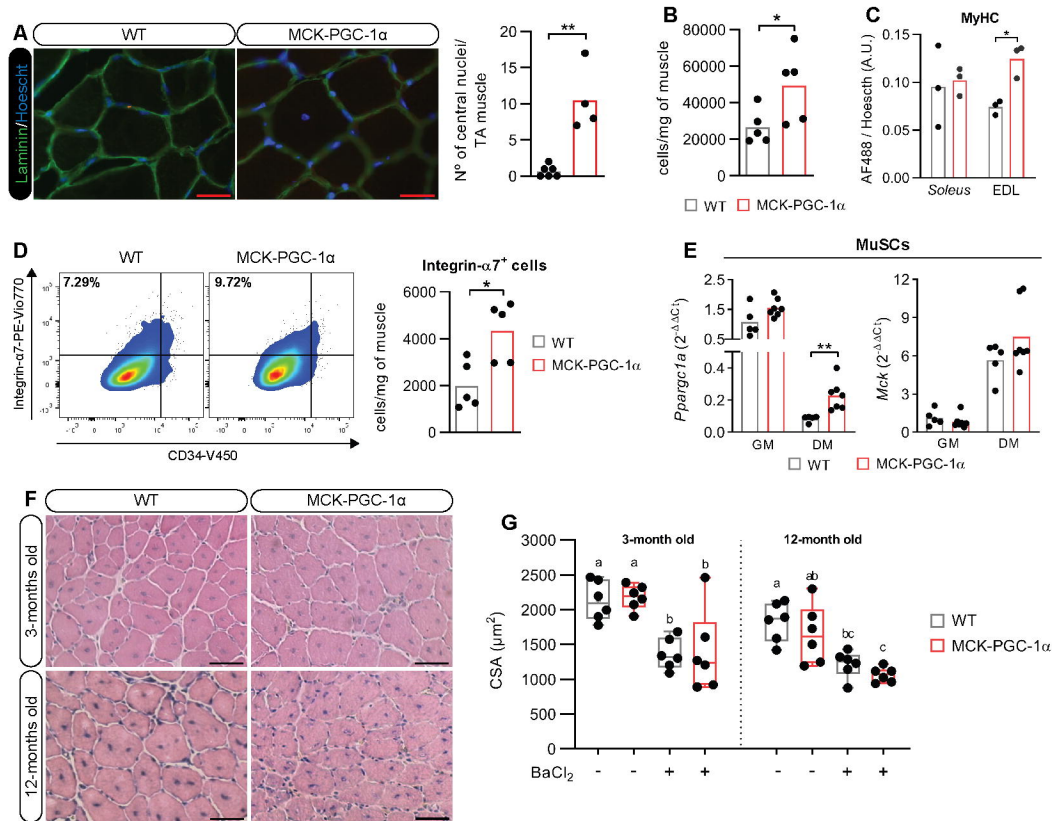

**Figure 3**

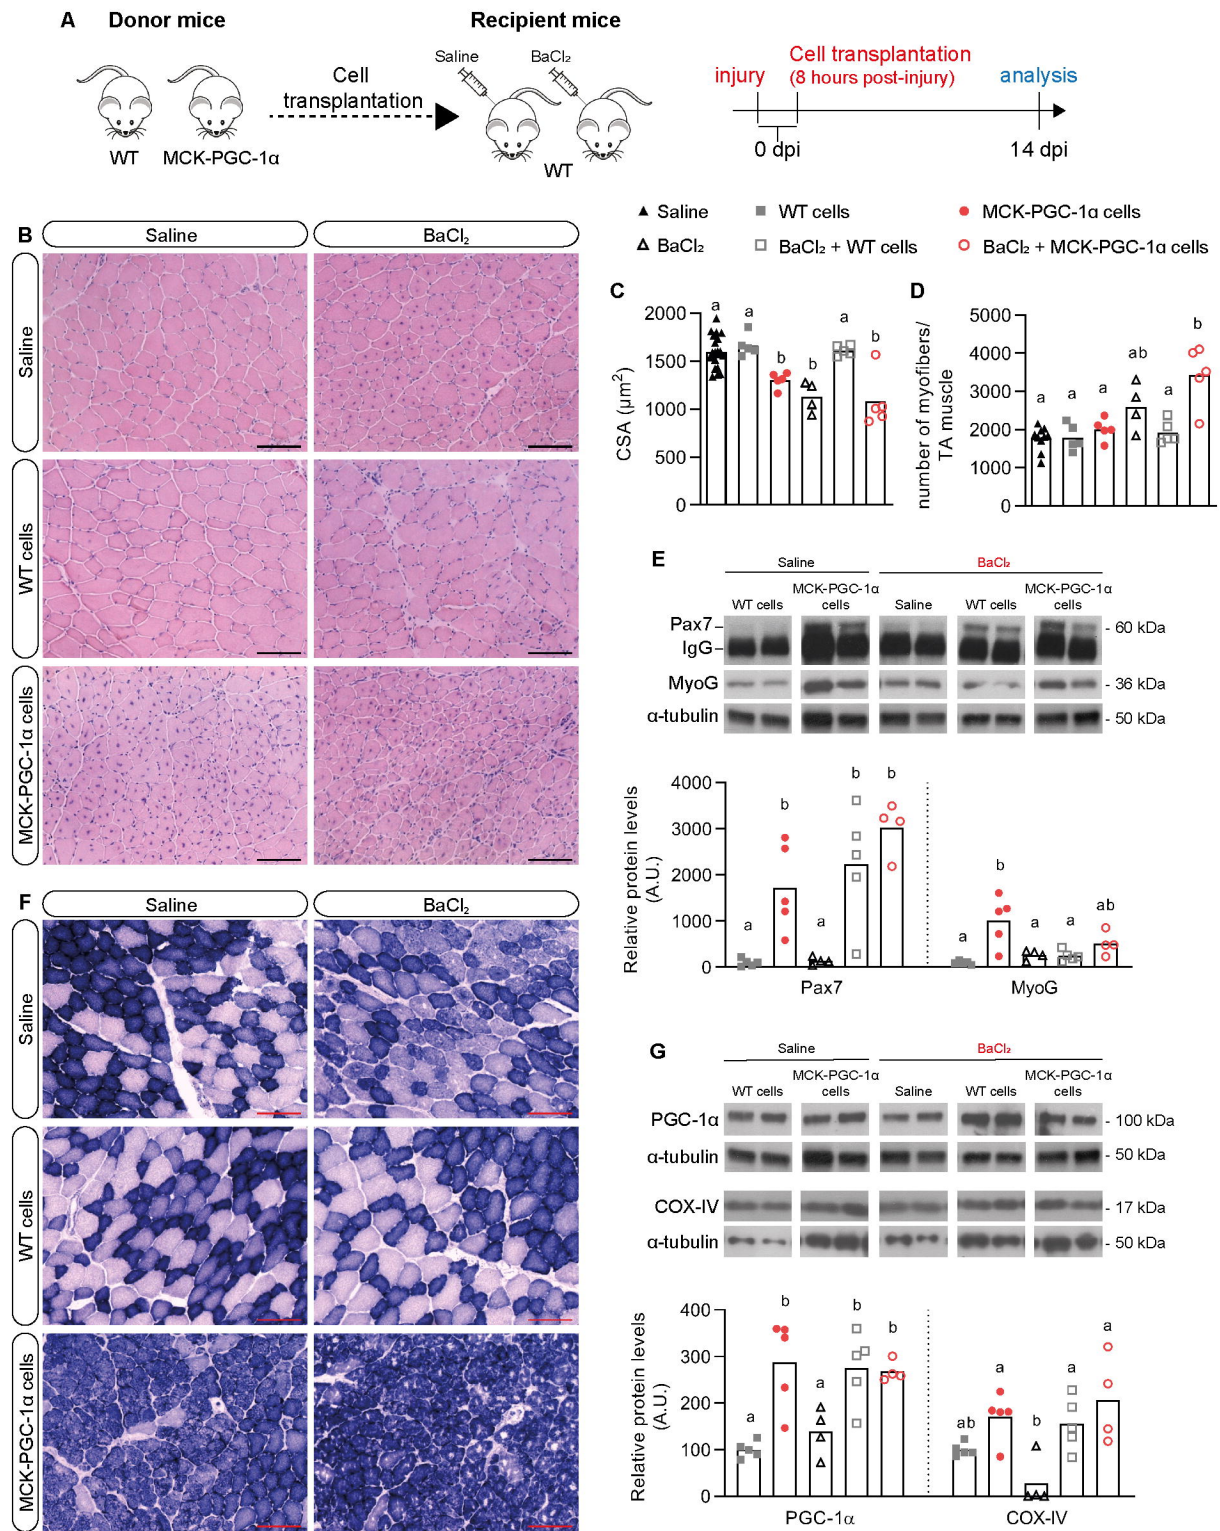

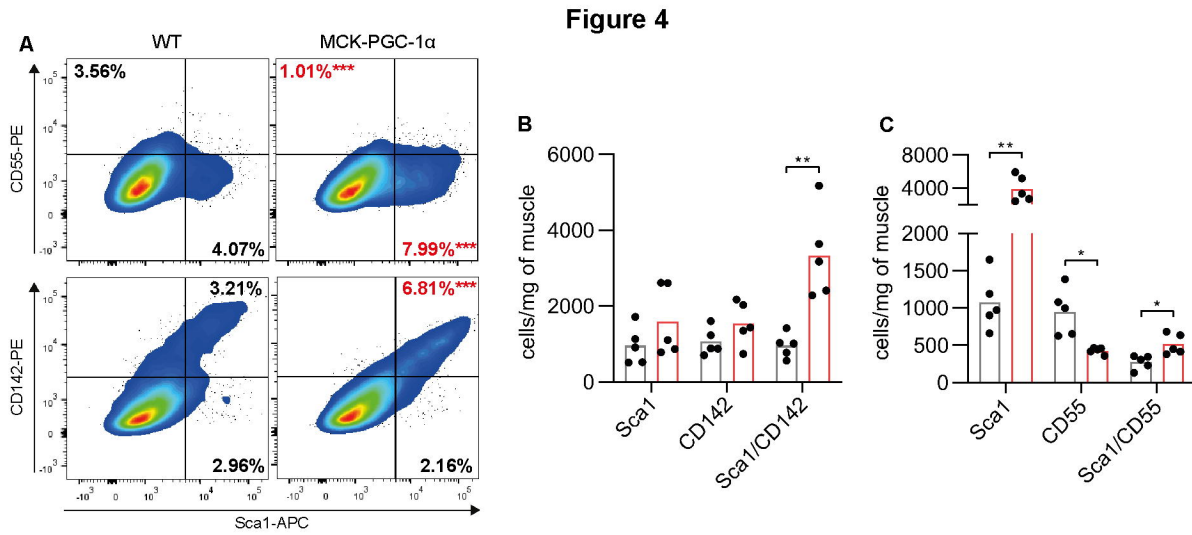

**Figure 5**

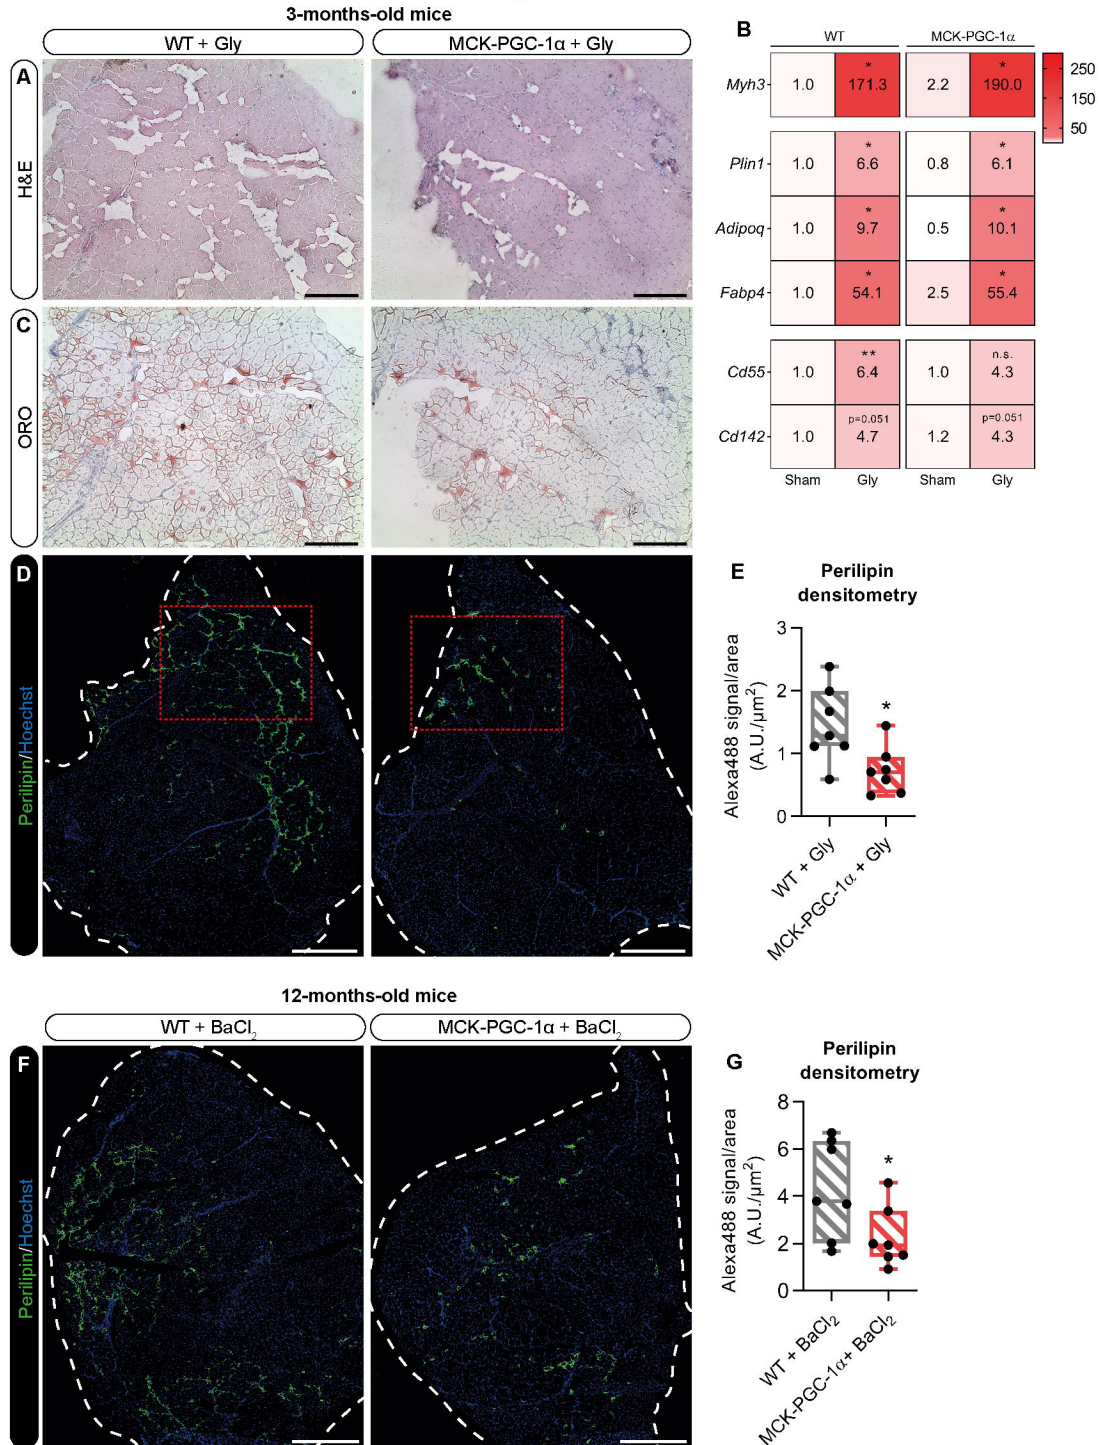

Source: https://www.biorxiv.org/content/biorxiv/early/2021/11/03/2021.11.03.466970.full.pdf
